- An analysis of 101 clinical investigations. *Intensive Care Med* 1996; 22:519–29
21. Finigan JH: The coagulation system and pulmonary endothelial function in acute lung injury. *Microvasc Res* 2009; 77:35–8
  22. Walker MG, Yao LJ, Patterson EK, Joseph MG, Cepinskas G, Veldhuizen RA, Lewis JF, Yamashita CM: The effect of tidal volume on systemic inflammation in Acid-induced lung injury. *Respiration* 2011; 81:333–42
  23. Wolthuis EK, Choi G, Dessing MC, Bresser P, Lutter R, Dzoljic M, van der Poll T, Vroom MB, Hollmann M, Schultz MJ: Mechanical ventilation with lower tidal volumes and positive end-expiratory pressure prevents pulmonary inflammation in patients without preexisting lung injury. *ANESTHESIOLOGY* 2008; 108:46–54
  24. Choi G, Wolthuis EK, Bresser P, Levi M, van der Poll T, Dzoljic M, Vroom MB, Schultz MJ: Mechanical ventilation with lower tidal volumes and positive end-expiratory pressure prevents alveolar coagulation in patients without lung injury. *ANESTHESIOLOGY* 2006; 105:689–95
  25. Bolin RW, Pierson DJ: Ventilatory management in acute lung injury. *Crit Care Clin* 1986; 2:585–99
  26. Papazian L, Forel JM, Gacouin A, Penot-Ragon C, Perrin G, Loundou A, Jaber S, Arnal JM, Perez D, Seghboyan JM, Constantin JM, Courant P, Lefrant JY, Guérin C, Prat G, Morange S, Roch A; ACURASYS Study Investigators: Neuromuscular blockers in early acute respiratory distress syndrome. *N Engl J Med* 2010; 363:1107–16
  27. Licker M, de Perrot M, Spiliopoulos A, Robert J, Diaper J, Chevalley C, Tschopp JM: Risk factors for acute lung injury after thoracic surgery for lung cancer. *Anesth Analg* 2003; 97:1558–65
  28. Licker M, Diaper J, Villiger Y, Spiliopoulos A, Licker V, Robert J, Tschopp JM: Impact of intraoperative lung-protective interventions in patients undergoing lung cancer surgery. *Crit Care* 2009; 13:R41

## ANESTHESIOLOGY REFLECTIONS FROM THE WOOD LIBRARY-MUSEUM

### Asylum & Main: From Wells to Whoppers

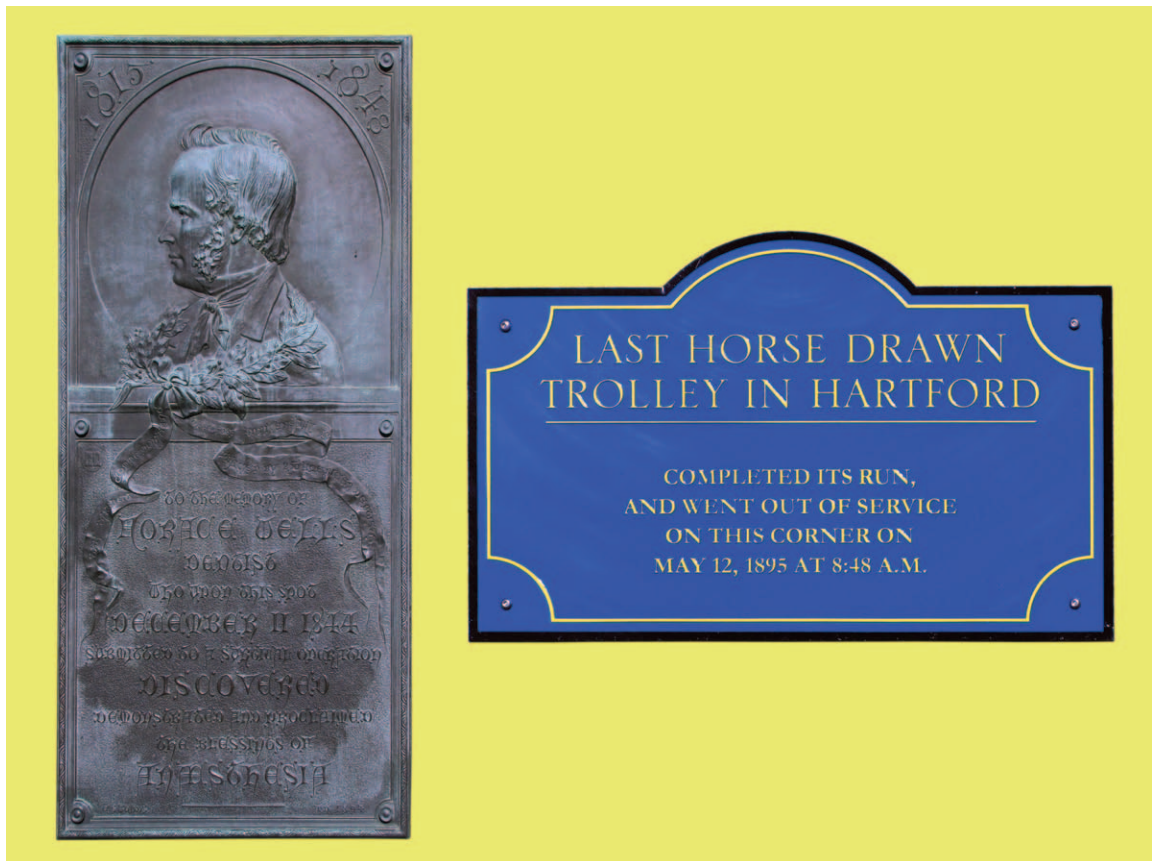

Near the corner of Asylum & Main Streets in Hartford, Connecticut, is a plaque (*left*) marking the site of the dental office where Horace Wells bravely volunteered on December 11, 1844, to undergo dental extraction under nitrous oxide—an *historic first*. Fast-forward to 1895, that same intersection (*right*) marked Hartford's last horse-drawn trolley—an *historic last*. Fast-forward to May of 2013, at the building bearing these very markers, from perhaps the most famously situated Burger King in America, this author placed an order to fill his fat belly—an *historic middle!* (Copyright © the American Society of Anesthesiologists, Inc.)

George S. Bause, M.D., M.P.H., Honorary Curator, ASA's Wood Library-Museum of Anesthesiology, Park Ridge, Illinois, and Clinical Associate Professor, Case Western Reserve University, Cleveland, Ohio. UJYC@aol.com.
